# Supplementary material for: Major histocompatibility complex harbors widespread genotypic variability of non-additive risk of rheumatoid arthritis including epistasis
Source: PubMed Central journal article supplement (PMC4842957; doi:10.1038/srep25014), 2016-04-25
Supplement: srep25014-s1.pdf [file srep25014-s1.pdf]

**Major histocompatibility complex harbors widespread genotypic variability of non-additive risk of rheumatoid arthritis including epistasis**

Wen-Hua Wei,<sup>1,2,\*</sup> John Bowes,<sup>1</sup> Darren Plant,<sup>1</sup> Sebastien Viatte,<sup>1</sup> Annie Yarwood,<sup>1</sup> Jonathan Massey,<sup>1</sup> Jane Worthington,<sup>1,3</sup> Stephen Eyre<sup>1,3</sup>

<sup>1</sup>Arthritis Research UK Centre for Genetics and Genomics, Institute of Inflammation and Repair, Faculty of Medical and Human Sciences, Manchester Academic Health Science Centre, University of Manchester, Oxford Road, Manchester M13 9PT, UK

<sup>2</sup>Department of Women's and Children's Health, Dunedin School of Medicine, University of Otago, Dunedin 9016, New Zealand

<sup>3</sup>NIHR Manchester Musculoskeletal Biomedical Research Unit, Central Manchester NHS Foundation Trust, Manchester Academic Health Science Centre, Manchester, UK

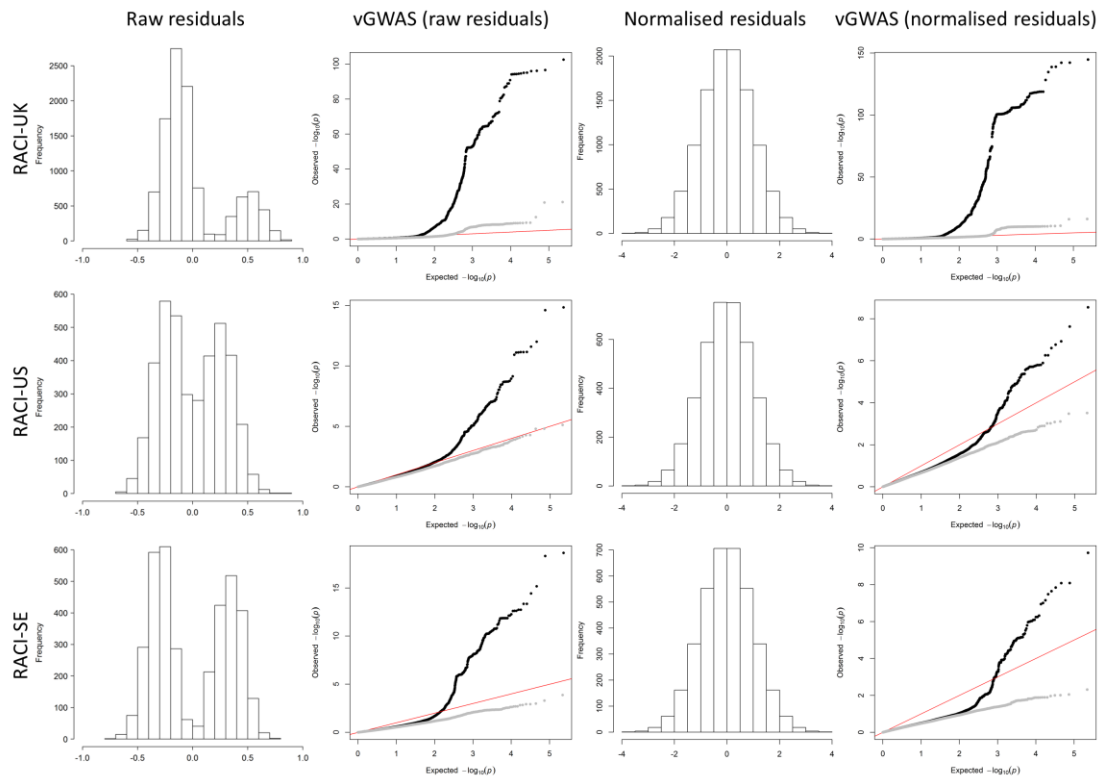

Supplementary Figure S1: Histograms of the environmental residuals (raw or normalized) and quantile-quantile plots of corresponding vGWAS analyses in RACI-UK (top row), RACI-US (middle row) and RACI-SE (bottom row). Series excluding MHC are in grey in QQ plots

**Histogram of RACI-UK 1000 permutations**

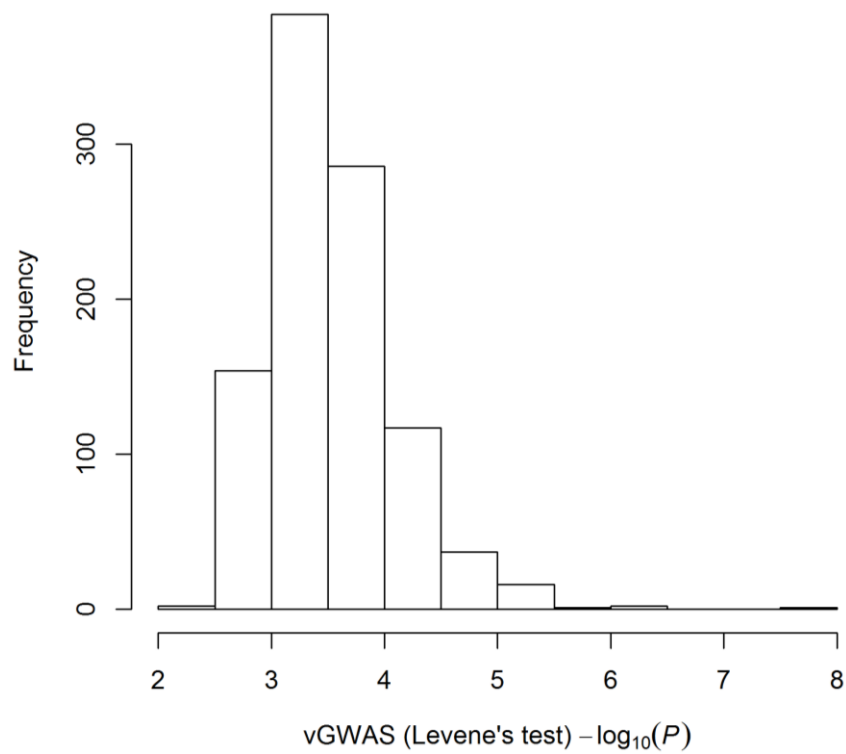

Supplementary Figure S2: Histograms of the lowest P values (at the  $-\log_{10}$  scale) in each of the 1000 vGWASs based on randomly permuted environmental residuals in the RACI-UK cohort

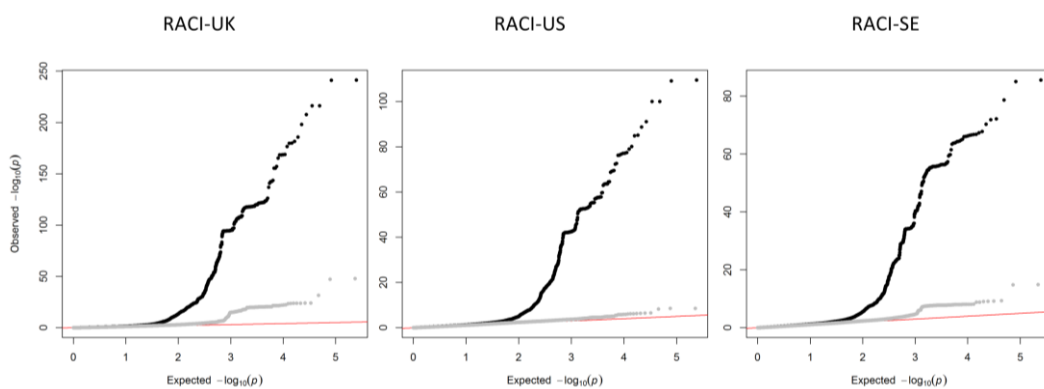

Supplementary Figure S3: Quantile-quantile plots of the conventional GWAS analyses (series excluding MHC are in grey) in RACI-UK, RACI-US and RACI-SE

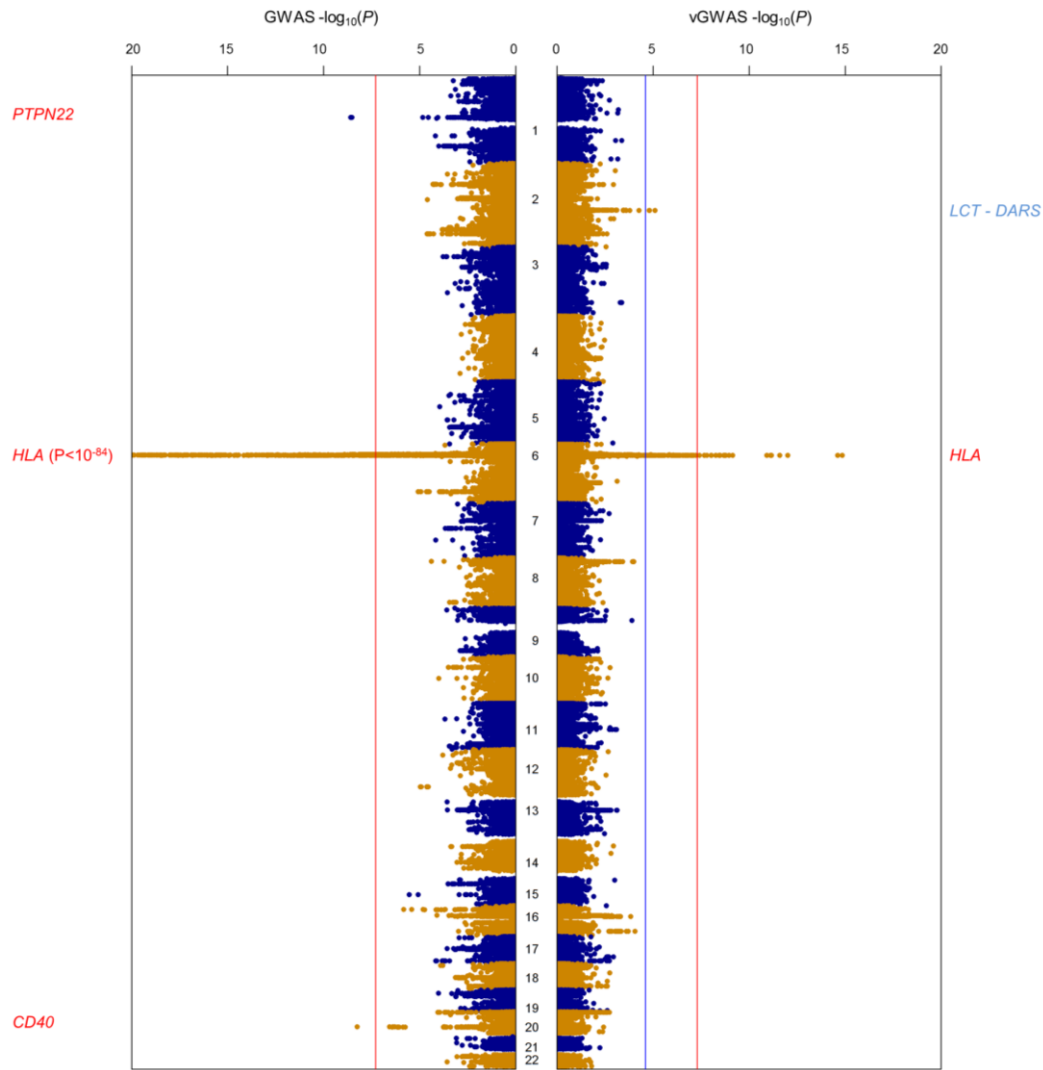

Supplementary Figure S4: Aligned Manhattan plots of GWAS (left) and vGWAS (right) analyses in RACI-US. P values are at the  $-\log_{10}$  scale; red line represents GWAS genome-wide significance threshold; blue line represents vGWAS significance threshold derived from permutation; significant loci are annotated to genes in red (or blue if reached only the vGWAS significance threshold)

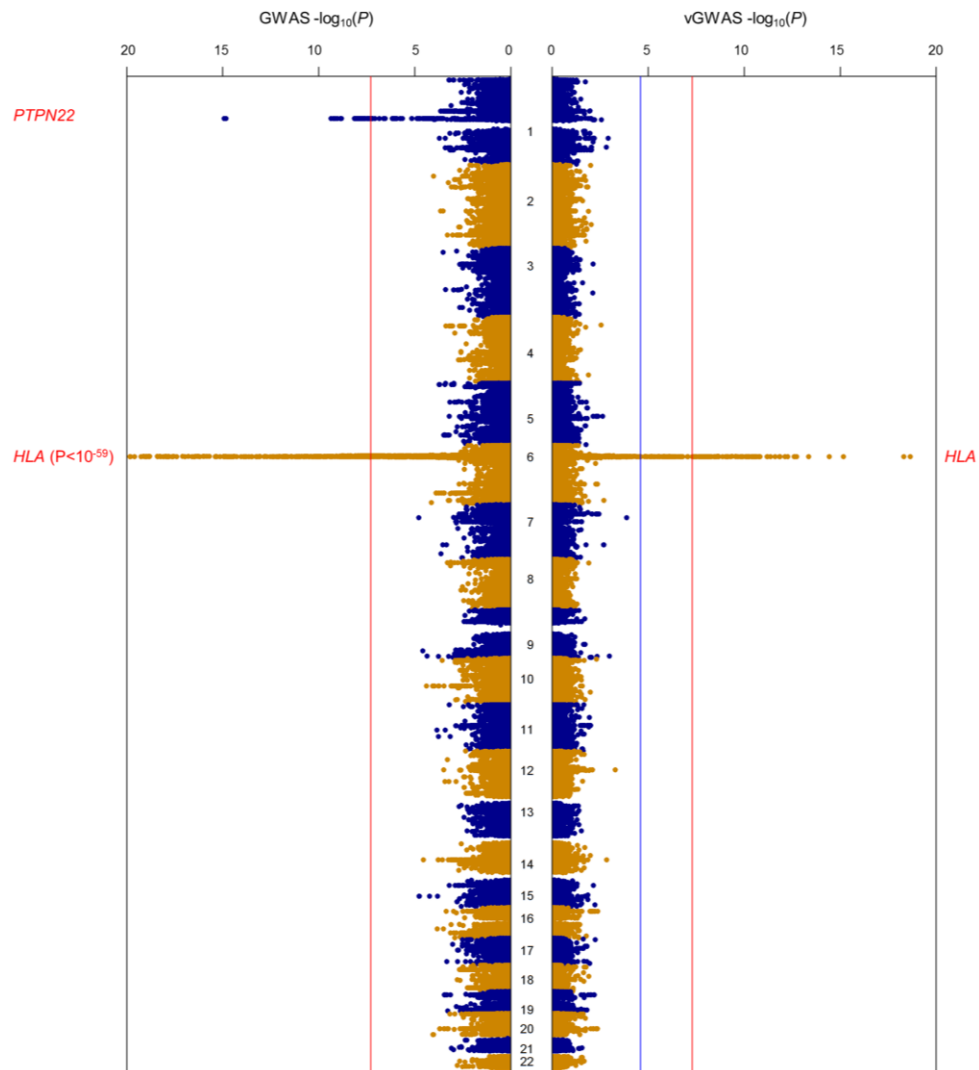

Supplementary Figure S5: Aligned Manhattan plots of GWAS (left) and vGWAS (right) analyses in RACI-SE. P values are at the  $-\log_{10}$  scale; red line represents GWAS genome-wide significance threshold; blue line represents vGWAS significance threshold derived from permutation; significant loci are annotated to genes in red (or blue if reached only the vGWAS significance threshold)

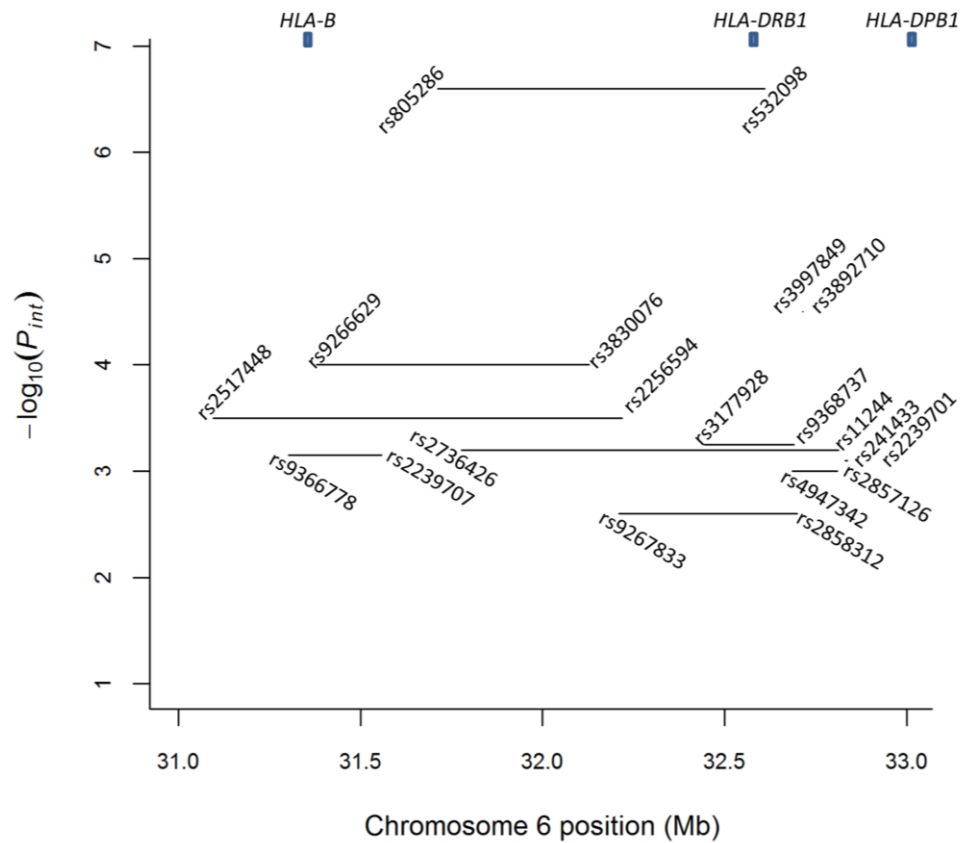

Supplementary Figure S6: Alignment of ten independent epistatic pairs of SNPs within the MHC region in RACI-UK. Each horizontal line represents an interaction between a start SNP (left) and an end SNP (right) (lines very short for rs3997849 - rs3892710 and rs241433 - rs2239701); each dark small bar and a gene label at the top of graph represents a major RA gene within MHC; y-axis: conditional interaction P-values in the  $-\log_{10}$  scale; x-axis: genomic location in megabase (GRCh38/hg38)

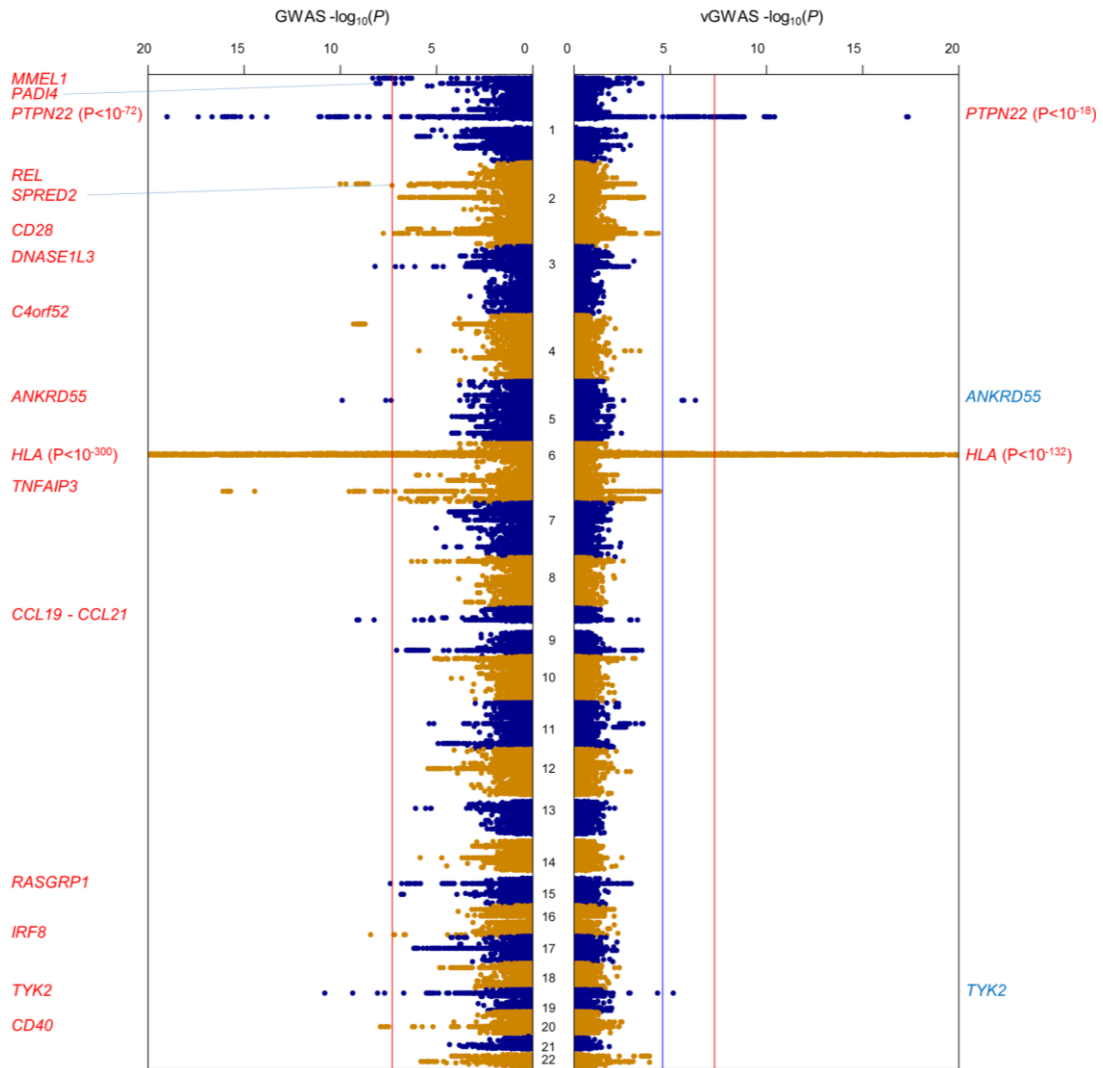

Supplementary Figure S7: Aligned Manhattan plots of GWAS (left) and vGWAS (right) analyses in the cohort combined RACI-UK, RACI-US and RACI-SE. P values are at the  $-\log_{10}$  scale; red line represents GWAS genome-wide significance threshold; blue line represents vGWAS significance threshold derived from permutation; significant loci are annotated to genes in red (or blue if reached only the vGWAS significance threshold)

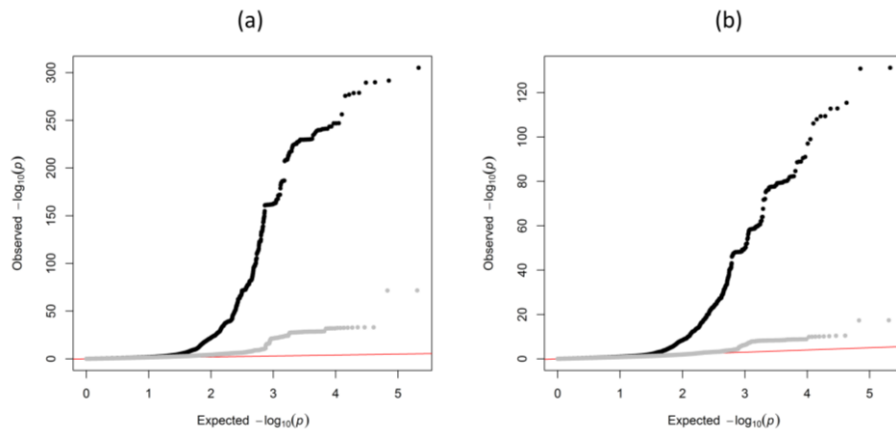

Supplementary Figure S8: Quantile-quantile plots of the GWAS and vGWAS analyses in the Combined cohort. (a) GWAS QQ plot with and without MHC (grey); (b) vGWAS QQ plot with and without MHC (grey)



Supplementary Table S1: Forward selection choose 20 independent GWAS

significant SNPs in RACI-UK

| SNP        | Chromosome | Position    | GWAS_P_value |
|------------|------------|-------------|--------------|
| rs6931277  | 6          | 32 615 580  | 4.23E-242    |
| rs17496549 | 6          | 32 441 931  | 6.61E-14     |
| rs2476601  | 1          | 113 834 946 | 1.36E-48     |
| rs2596560  | 6          | 31 387 541  | 2.15E-09     |
| rs9277538  | 6          | 33 087 270  | 4.72E-20     |
| rs2269425  | 6          | 32 155 862  | 5.71E-11     |
| rs928722   | 6          | 137 652 695 | 1.70E-10     |
| rs34536443 | 19         | 10 352 442  | 4.65E-09     |
| rs3819721  | 6          | 32 837 021  | 4.70E-84     |
| rs1233394  | 6          | 29 581 484  | 2.83E-10     |
| rs4540292  | 6          | 31 349 405  | 1.39E-13     |
| rs17422797 | 6          | 32 297 751  | 1.40E-15     |
| rs9268543  | 6          | 32 417 024  | 1.63E-208    |
| rs13196329 | 6          | 32 357 594  | 7.91E-10     |
| rs10484565 | 6          | 32 827 255  | 2.65E-25     |
| rs384247   | 6          | 32 216 797  | 3.90E-13     |
| rs2524084  | 6          | 31 273 862  | 1.06E-15     |
| rs2242656  | 6          | 31 646 325  | 5.74E-12     |
| rs3104407  | 6          | 32 714 675  | 1.96E-41     |
| rs2097431  | 6          | 32 623 056  | 9.29E-11     |

Supplementary Table S2: The directly replicated MHC SNPs and their P values in vGWAS and GWAS in three cohorts

| SNP        | Position   | RACI-UK_vGWAS | RACI-UK_GWAS | RACI-US_vGWAS | RACI-US_GWAS | RACI-SE_vGWAS | RACI-SE_GWAS |
|------------|------------|---------------|--------------|---------------|--------------|---------------|--------------|
| rs2255221  | 31 463 914 | 9.55E-07      | 7.43E-12     | 4.07E-03      | 1.37E-08     | 1.04E-03      | 1.44E-05     |
| rs2857694  | 31 620 093 | 9.71E-15      | 1.11E-28     | 6.17E-03      | 1.36E-08     | 9.02E-03      | 5.43E-17     |
| rs2736171  | 31 627 710 | 4.08E-15      | 1.05E-29     | 4.01E-03      | 2.96E-08     | 9.16E-03      | 3.97E-17     |
| rs2261033  | 31 635 814 | 4.31E-39      | 1.06E-67     | 1.52E-03      | 1.58E-27     | 1.69E-03      | 1.14E-24     |
| rs28366155 | 31 690 857 | 5.61E-11      | 6.07E-19     | 4.91E-03      | 1.67E-11     | 1.10E-02      | 7.35E-05     |
| rs6916278  | 31 710 997 | 4.80E-11      | 4.84E-19     | 8.99E-03      | 9.04E-11     | 9.73E-03      | 5.60E-05     |
| rs805284   | 31 714 252 | 1.12E-31      | 1.46E-60     | 3.01E-04      | 1.46E-25     | 5.48E-03      | 1.55E-18     |
| rs707939   | 31 758 911 | 3.30E-33      | 6.01E-62     | 1.24E-02      | 4.76E-21     | 1.20E-04      | 2.48E-22     |
| rs2075800  | 31 810 169 | 8.59E-35      | 4.37E-65     | 1.15E-02      | 2.55E-21     | 2.53E-04      | 9.27E-23     |
| rs521977   | 31 869 050 | 9.59E-14      | 4.82E-22     | 1.12E-03      | 6.01E-09     | 3.27E-02      | 1.14E-10     |
| rs494620   | 31 870 936 | 8.28E-24      | 1.11E-43     | 2.69E-02      | 1.73E-17     | 6.17E-05      | 3.28E-22     |
| rs614549   | 31 872 848 | 1.77E-27      | 1.26E-50     | 4.16E-02      | 1.45E-18     | 1.34E-04      | 4.60E-24     |
| rs2736428  | 31 876 147 | 6.10E-30      | 3.33E-55     | 3.79E-02      | 3.54E-18     | 5.60E-04      | 8.13E-20     |
| rs6907185  | 31 876 907 | 1.04E-08      | 6.14E-16     | 1.10E-03      | 2.70E-11     | 6.76E-06      | 2.01E-07     |
| rs2844458  | 31 883 692 | 1.47E-30      | 1.29E-56     | 1.96E-02      | 1.56E-16     | 6.73E-04      | 1.41E-19     |
| rs535586   | 31 892 560 | 1.84E-14      | 2.19E-24     | 9.44E-04      | 1.01E-07     | 1.77E-02      | 8.65E-11     |
| rs644045   | 31 916 180 | 4.22E-22      | 1.21E-37     | 1.40E-02      | 1.41E-13     | 1.50E-02      | 1.13E-15     |
| rs544167   | 31 922 381 | 1.38E-09      | 5.06E-17     | 1.45E-02      | 7.50E-10     | 2.77E-10      | 2.72E-10     |
| rs2734335  | 31 926 167 | 1.15E-26      | 2.78E-47     | 1.20E-02      | 7.98E-17     | 1.26E-02      | 4.92E-17     |
| rs3020644  | 31 926 849 | 1.98E-24      | 9.79E-45     | 4.37E-02      | 5.27E-11     | 1.75E-02      | 3.33E-10     |
| rs621701   | 31 935 344 | 1.58E-09      | 5.96E-17     | 1.21E-02      | 2.96E-10     | 4.27E-10      | 3.27E-10     |
| rs550605   | 31 939 370 | 4.05E-11      | 1.08E-20     | 1.13E-02      | 3.91E-11     | 2.20E-09      | 3.88E-11     |
| rs541862   | 31 949 174 | 2.40E-11      | 3.78E-21     | 1.15E-02      | 9.04E-11     | 2.55E-09      | 5.74E-11     |
| rs4151657  | 31 949 763 | 3.31E-33      | 6.38E-61     | 3.42E-02      | 1.25E-17     | 1.30E-03      | 8.18E-18     |
| rs2072633  | 31 951 801 | 1.23E-29      | 3.41E-51     | 2.79E-03      | 9.57E-21     | 5.12E-03      | 7.57E-25     |

|            |            |          |          |          |          |          |          |
|------------|------------|----------|----------|----------|----------|----------|----------|
| rs760070   | 31 952 179 | 2.54E-11 | 4.82E-21 | 1.11E-02 | 6.14E-11 | 2.55E-09 | 5.74E-11 |
| rs592229   | 31 962 664 | 8.63E-21 | 9.51E-37 | 4.45E-03 | 1.81E-10 | 3.64E-03 | 1.45E-12 |
| rs444921   | 31 964 400 | 2.92E-10 | 9.86E-19 | 4.97E-03 | 3.44E-09 | 1.56E-04 | 1.97E-06 |
| rs406936   | 31 965 384 | 2.64E-10 | 7.66E-19 | 4.28E-03 | 1.01E-09 | 1.60E-04 | 2.17E-06 |
| rs454212   | 31 966 595 | 2.60E-10 | 7.64E-19 | 4.60E-03 | 2.00E-09 | 1.51E-04 | 1.91E-06 |
| rs449643   | 31 968 902 | 2.60E-10 | 7.64E-19 | 4.71E-03 | 1.56E-09 | 1.49E-04 | 1.91E-06 |
| rs387608   | 31 973 780 | 2.30E-10 | 5.01E-19 | 4.75E-03 | 2.42E-09 | 1.31E-04 | 1.27E-06 |
| rs389512   | 31 979 817 | 6.22E-10 | 2.43E-18 | 9.79E-03 | 5.64E-09 | 2.01E-04 | 3.56E-06 |
| rs2857009  | 32 051 969 | 1.39E-36 | 5.15E-67 | 2.76E-02 | 5.06E-19 | 1.53E-04 | 5.42E-21 |
| rs6902493  | 32 055 121 | 1.00E-36 | 2.63E-67 | 2.43E-02 | 1.41E-18 | 2.60E-04 | 2.98E-21 |
| rs2239689  | 32 062 507 | 1.02E-36 | 3.76E-67 | 2.66E-02 | 1.95E-18 | 3.11E-04 | 2.85E-21 |
| rs7766862  | 32 065 230 | 6.81E-37 | 2.03E-67 | 2.18E-02 | 1.79E-18 | 2.20E-04 | 1.12E-21 |
| rs2071295  | 32 070 923 | 1.49E-36 | 1.01E-66 | 2.48E-02 | 1.09E-18 | 1.86E-04 | 1.68E-21 |
| rs2071293  | 32 094 910 | 2.55E-36 | 1.81E-67 | 2.38E-02 | 1.05E-18 | 1.35E-04 | 4.49E-22 |
| rs17421624 | 32 098 400 | 4.01E-36 | 3.26E-67 | 2.19E-02 | 5.07E-19 | 7.94E-05 | 3.27E-22 |
| rs2269426  | 32 108 722 | 2.89E-09 | 1.47E-17 | 7.43E-03 | 7.50E-05 | 1.75E-02 | 9.71E-12 |
| rs8111     | 32 115 398 | 4.44E-23 | 1.41E-44 | 4.09E-02 | 4.76E-13 | 4.06E-03 | 4.49E-16 |
| rs2228628  | 32 121 077 | 1.88E-23 | 9.57E-45 | 4.71E-02 | 2.70E-12 | 4.20E-03 | 1.48E-16 |
| rs9267803  | 32 133 985 | 8.67E-24 | 3.58E-46 | 2.70E-02 | 4.67E-13 | 3.82E-03 | 1.66E-17 |
| rs4713505  | 32 137 224 | 3.10E-24 | 6.89E-46 | 3.44E-02 | 7.03E-12 | 4.53E-03 | 9.64E-17 |
| rs4713506  | 32 146 203 | 8.28E-24 | 1.71E-46 | 4.03E-02 | 4.40E-11 | 9.86E-03 | 2.02E-16 |
| rs9296009  | 32 146 738 | 2.47E-43 | 2.37E-79 | 1.62E-02 | 1.89E-40 | 4.06E-02 | 2.77E-21 |
| rs10947233 | 32 156 647 | 1.93E-35 | 1.13E-68 | 2.09E-03 | 1.20E-25 | 4.10E-04 | 1.71E-22 |
| rs2070600  | 32 183 666 | 3.55E-36 | 2.81E-69 | 3.22E-03 | 2.25E-26 | 7.26E-04 | 2.61E-23 |
| rs1800684  | 32 184 217 | 3.92E-10 | 4.39E-17 | 1.07E-02 | 7.52E-07 | 4.90E-02 | 1.24E-04 |
| rs2022059  | 32 188 712 | 2.04E-38 | 1.87E-72 | 3.61E-03 | 1.42E-23 | 1.61E-03 | 3.39E-21 |
| rs8192575  | 32 198 607 | 7.80E-35 | 7.53E-65 | 1.96E-03 | 4.76E-22 | 8.04E-03 | 5.57E-19 |
| rs2071285  | 32 212 654 | 5.90E-34 | 6.58E-64 | 1.92E-03 | 4.47E-22 | 8.20E-03 | 5.30E-19 |

|            |            |          |           |          |          |          |          |
|------------|------------|----------|-----------|----------|----------|----------|----------|
| rs2854050  | 32 217 828 | 2.28E-34 | 1.85E-64  | 1.91E-03 | 2.69E-22 | 7.41E-03 | 3.86E-19 |
| rs375244   | 32 223 680 | 1.76E-10 | 3.37E-19  | 8.30E-03 | 1.44E-11 | 2.62E-02 | 8.59E-10 |
| rs396960   | 32 223 804 | 5.33E-12 | 5.93E-22  | 3.86E-02 | 2.69E-10 | 2.01E-02 | 2.01E-06 |
| rs3134929  | 32 224 330 | 4.57E-24 | 1.62E-43  | 5.58E-03 | 7.16E-23 | 3.05E-08 | 1.66E-21 |
| rs3096702  | 32 224 554 | 1.67E-22 | 2.37E-42  | 2.94E-07 | 9.98E-25 | 3.72E-04 | 1.00E-16 |
| rs397081   | 32 224 840 | 1.54E-06 | 7.40E-12  | 7.69E-04 | 1.42E-08 | 4.93E-08 | 8.34E-11 |
| rs479536   | 32 225 901 | 2.86E-09 | 9.31E-16  | 4.71E-03 | 3.55E-09 | 2.24E-03 | 1.52E-05 |
| rs9267853  | 32 227 474 | 1.44E-22 | 1.70E-42  | 3.81E-07 | 6.78E-24 | 3.55E-04 | 1.02E-16 |
| rs6457499  | 32 231 171 | 1.03E-18 | 9.53E-35  | 3.29E-09 | 2.37E-26 | 7.05E-03 | 1.42E-13 |
| rs9267873  | 32 231 575 | 2.19E-25 | 9.29E-47  | 2.12E-07 | 2.88E-24 | 1.67E-04 | 6.43E-17 |
| rs9267911  | 32 237 333 | 2.19E-26 | 5.28E-47  | 1.52E-07 | 4.65E-26 | 4.29E-03 | 8.38E-19 |
| rs6906128  | 32 238 527 | 4.91E-16 | 2.52E-30  | 9.38E-09 | 5.75E-25 | 5.87E-03 | 4.12E-13 |
| rs416352   | 32 239 616 | 6.53E-20 | 8.71E-36  | 5.73E-04 | 6.25E-18 | 6.56E-03 | 5.96E-19 |
| rs419132   | 32 243 022 | 6.01E-16 | 2.57E-31  | 4.73E-07 | 1.20E-16 | 1.06E-02 | 2.22E-11 |
| rs412657   | 32 243 308 | 2.10E-29 | 8.81E-53  | 1.75E-03 | 8.83E-27 | 1.21E-04 | 5.57E-26 |
| rs9267947  | 32 243 441 | 1.96E-22 | 2.70E-41  | 2.47E-03 | 3.90E-21 | 6.15E-04 | 1.28E-18 |
| rs9267948  | 32 244 456 | 3.10E-36 | 9.95E-66  | 4.35E-07 | 1.43E-30 | 8.67E-05 | 3.56E-24 |
| rs17576984 | 32 245 208 | 2.13E-07 | 3.12E-14  | 4.65E-02 | 1.73E-07 | 2.68E-09 | 1.75E-15 |
| rs9267954  | 32 245 275 | 8.28E-57 | 6.31E-102 | 6.03E-04 | 8.28E-43 | 1.55E-06 | 7.78E-33 |
| rs9267955  | 32 245 373 | 1.91E-15 | 1.86E-25  | 8.32E-03 | 1.05E-10 | 1.66E-02 | 2.37E-06 |
| rs454748   | 32 245 433 | 3.75E-27 | 1.73E-47  | 1.53E-03 | 7.57E-20 | 1.26E-03 | 2.30E-21 |
| rs9267956  | 32 245 861 | 6.52E-38 | 6.53E-69  | 8.99E-04 | 1.53E-30 | 7.64E-06 | 8.61E-26 |
| rs440169   | 32 246 011 | 1.88E-28 | 1.64E-51  | 3.78E-03 | 2.86E-21 | 4.47E-04 | 2.29E-23 |
| rs9267958  | 32 246 839 | 1.61E-28 | 1.20E-51  | 3.71E-03 | 3.48E-21 | 4.32E-04 | 2.38E-23 |
| rs563412   | 32 247 286 | 8.85E-29 | 7.23E-52  | 5.55E-03 | 1.64E-21 | 5.31E-04 | 7.11E-24 |
| rs405875   | 32 247 411 | 6.85E-29 | 4.79E-52  | 6.01E-03 | 1.05E-21 | 4.19E-04 | 6.01E-24 |
| rs1559876  | 32 247 992 | 1.53E-37 | 1.82E-68  | 9.42E-04 | 2.24E-29 | 1.20E-05 | 1.04E-25 |
| rs2894239  | 32 248 019 | 1.61E-28 | 1.20E-51  | 4.79E-03 | 1.19E-20 | 4.39E-04 | 2.66E-23 |

|            |            |          |           |          |          |          |          |
|------------|------------|----------|-----------|----------|----------|----------|----------|
| rs2395110  | 32 248 099 | 6.85E-29 | 4.79E-52  | 6.01E-03 | 1.05E-21 | 4.19E-04 | 6.01E-24 |
| rs3115576  | 32 249 073 | 1.63E-28 | 1.19E-51  | 3.71E-03 | 3.48E-21 | 3.91E-04 | 1.85E-23 |
| rs6457508  | 32 249 186 | 1.61E-28 | 1.20E-51  | 3.61E-03 | 3.80E-21 | 4.86E-04 | 2.40E-23 |
| rs6457509  | 32 249 241 | 3.48E-28 | 3.70E-51  | 3.69E-03 | 2.49E-21 | 4.05E-04 | 1.37E-23 |
| rs6936204  | 32 249 315 | 7.53E-35 | 3.84E-58  | 8.77E-04 | 2.56E-28 | 7.28E-05 | 3.14E-29 |
| rs9267970  | 32 249 383 | 1.72E-28 | 1.32E-51  | 3.71E-03 | 3.48E-21 | 3.96E-04 | 1.79E-23 |
| rs2894240  | 32 250 069 | 1.61E-28 | 1.20E-51  | 3.71E-03 | 3.48E-21 | 4.23E-04 | 2.69E-23 |
| rs3115573  | 32 251 066 | 1.61E-28 | 1.20E-51  | 3.71E-03 | 3.48E-21 | 4.11E-04 | 2.24E-23 |
| rs9267992  | 32 252 620 | 2.80E-15 | 3.21E-25  | 8.87E-03 | 9.91E-11 | 1.65E-02 | 1.97E-06 |
| rs3115572  | 32 252 707 | 5.45E-26 | 3.08E-43  | 5.58E-03 | 2.19E-19 | 1.40E-04 | 8.91E-23 |
| rs3130316  | 32 253 451 | 4.92E-26 | 2.28E-43  | 5.32E-03 | 2.92E-19 | 1.37E-04 | 1.08E-22 |
| rs3115570  | 32 254 929 | 1.53E-28 | 2.25E-51  | 2.49E-03 | 2.14E-21 | 4.92E-04 | 1.47E-22 |
| rs3130320  | 32 255 481 | 8.81E-40 | 1.09E-65  | 1.07E-03 | 6.97E-30 | 4.42E-06 | 4.02E-33 |
| rs9268103  | 32 277 593 | 9.98E-15 | 1.79E-26  | 6.47E-03 | 4.68E-11 | 4.49E-02 | 1.04E-07 |
| rs9268132  | 32 286 877 | 5.13E-53 | 6.05E-95  | 1.79E-05 | 3.23E-43 | 1.11E-06 | 4.15E-35 |
| rs9268145  | 32 289 507 | 3.62E-95 | 3.75E-169 | 8.30E-07 | 2.36E-77 | 2.80E-11 | 7.73E-67 |
| rs4713518  | 32 289 560 | 5.83E-53 | 6.11E-95  | 2.48E-05 | 1.44E-42 | 1.02E-06 | 7.43E-35 |
| rs9268148  | 32 291 750 | 1.03E-14 | 1.85E-26  | 6.46E-03 | 4.73E-11 | 4.92E-02 | 4.71E-08 |
| rs482194   | 32 292 782 | 4.86E-53 | 5.36E-95  | 1.88E-05 | 3.97E-43 | 1.35E-06 | 6.21E-35 |
| rs7775397  | 32 293 475 | 9.68E-07 | 1.60E-10  | 4.24E-02 | 1.81E-06 | 8.38E-05 | 1.44E-09 |
| rs560505   | 32 293 994 | 1.91E-54 | 1.76E-97  | 1.35E-05 | 9.89E-43 | 5.12E-07 | 1.15E-36 |
| rs28366174 | 32 298 713 | 4.30E-10 | 8.69E-18  | 2.58E-04 | 1.40E-09 | 9.71E-05 | 4.39E-07 |
| rs537757   | 32 300 724 | 4.49E-53 | 4.63E-95  | 1.27E-05 | 2.00E-43 | 1.11E-06 | 4.25E-35 |
| rs477005   | 32 302 723 | 2.09E-54 | 2.00E-97  | 8.22E-06 | 7.08E-43 | 4.36E-07 | 8.17E-37 |
| rs3864299  | 32 303 897 | 5.36E-18 | 2.33E-29  | 4.94E-02 | 7.00E-16 | 9.38E-07 | 3.84E-23 |
| rs9268177  | 32 307 105 | 1.23E-06 | 2.59E-10  | 4.28E-02 | 1.87E-06 | 8.38E-05 | 1.44E-09 |
| rs502626   | 32 310 489 | 3.24E-53 | 3.10E-95  | 2.26E-05 | 8.38E-43 | 1.24E-06 | 5.51E-35 |
| rs9268199  | 32 310 858 | 2.32E-20 | 1.09E-34  | 2.01E-02 | 3.71E-17 | 1.43E-03 | 5.28E-15 |

|           |            |          |           |          |          |          |          |
|-----------|------------|----------|-----------|----------|----------|----------|----------|
| rs6939410 | 32 312 405 | 5.64E-19 | 8.87E-31  | 4.65E-02 | 5.45E-18 | 1.37E-06 | 1.50E-23 |
| rs1018433 | 32 313 733 | 4.03E-18 | 1.51E-29  | 3.95E-02 | 3.84E-16 | 8.38E-07 | 5.70E-23 |
| rs547261  | 32 314 256 | 2.72E-53 | 2.39E-95  | 4.18E-05 | 1.49E-43 | 1.21E-06 | 5.21E-35 |
| rs6910071 | 32 315 077 | 6.89E-95 | 4.11E-169 | 9.82E-07 | 4.98E-77 | 2.99E-11 | 5.21E-67 |
| rs531094  | 32 318 325 | 4.46E-53 | 4.35E-95  | 2.55E-05 | 5.01E-43 | 1.19E-06 | 4.06E-35 |
| rs539703  | 32 320 685 | 5.11E-53 | 6.65E-95  | 2.72E-05 | 3.19E-43 | 1.15E-06 | 3.08E-35 |
| rs546857  | 32 321 463 | 1.80E-54 | 1.60E-97  | 1.47E-05 | 1.14E-42 | 4.93E-07 | 8.41E-37 |
| rs547077  | 32 321 541 | 1.27E-53 | 1.06E-95  | 6.04E-05 | 1.57E-43 | 1.38E-06 | 7.50E-36 |
| rs570963  | 32 321 817 | 1.18E-09 | 1.19E-16  | 2.47E-03 | 7.35E-12 | 2.16E-02 | 3.01E-06 |
| rs9268235 | 32 322 431 | 9.68E-07 | 1.60E-10  | 4.24E-02 | 1.81E-06 | 1.11E-04 | 2.04E-09 |
| rs521828  | 32 323 866 | 4.11E-26 | 3.25E-43  | 2.20E-03 | 1.52E-26 | 3.01E-05 | 1.66E-24 |
| rs523627  | 32 324 060 | 3.73E-53 | 2.64E-95  | 2.55E-05 | 5.01E-43 | 1.32E-06 | 5.37E-35 |
| rs525607  | 32 324 307 | 1.06E-53 | 6.43E-96  | 6.04E-05 | 1.57E-43 | 1.50E-06 | 9.93E-36 |
| rs552339  | 32 324 938 | 4.19E-53 | 3.27E-95  | 2.55E-05 | 5.01E-43 | 1.32E-06 | 5.37E-35 |
| rs504203  | 32 327 066 | 4.08E-53 | 2.95E-95  | 2.51E-05 | 3.99E-43 | 1.37E-06 | 7.21E-35 |
| rs505274  | 32 327 215 | 3.86E-53 | 2.59E-95  | 2.51E-05 | 3.99E-43 | 1.49E-06 | 7.35E-35 |
| rs508805  | 32 327 573 | 4.50E-53 | 3.38E-95  | 2.51E-05 | 3.99E-43 | 1.51E-06 | 9.35E-35 |
| rs524578  | 32 327 580 | 1.15E-53 | 7.18E-96  | 6.03E-05 | 1.25E-43 | 1.54E-06 | 1.34E-35 |
| rs9348880 | 32 329 003 | 1.37E-53 | 8.51E-96  | 6.67E-05 | 2.59E-43 | 1.56E-06 | 1.02E-35 |
| rs9348881 | 32 329 065 | 1.33E-54 | 2.67E-97  | 6.95E-05 | 2.39E-43 | 1.56E-06 | 1.02E-35 |
| rs9368713 | 32 329 560 | 2.17E-53 | 7.31E-96  | 2.74E-05 | 4.21E-43 | 1.52E-06 | 5.64E-35 |
| rs9405090 | 32 330 595 | 6.25E-53 | 4.85E-95  | 2.85E-05 | 8.24E-43 | 1.38E-06 | 5.52E-35 |
| rs3129949 | 32 331 037 | 9.55E-18 | 7.23E-30  | 2.23E-03 | 1.33E-20 | 4.17E-05 | 2.54E-17 |
| rs1003878 | 32 332 045 | 8.77E-18 | 6.61E-30  | 2.23E-03 | 1.33E-20 | 4.17E-05 | 2.54E-17 |
| rs910052  | 32 332 096 | 5.30E-53 | 4.02E-95  | 2.85E-05 | 8.24E-43 | 1.38E-06 | 5.52E-35 |
| rs9366793 | 32 333 512 | 1.37E-53 | 8.51E-96  | 6.67E-05 | 2.59E-43 | 1.64E-06 | 1.05E-35 |
| rs9348882 | 32 333 545 | 5.14E-53 | 3.96E-95  | 2.85E-05 | 8.24E-43 | 1.38E-06 | 5.52E-35 |
| rs9380290 | 32 333 675 | 1.33E-53 | 8.41E-96  | 6.67E-05 | 2.59E-43 | 1.56E-06 | 1.02E-35 |

|            |            |          |           |          |          |          |          |
|------------|------------|----------|-----------|----------|----------|----------|----------|
| rs9357140  | 32 333 737 | 6.40E-53 | 5.11E-95  | 2.91E-05 | 1.11E-42 | 1.53E-06 | 7.35E-35 |
| rs1474729  | 32 334 268 | 6.35E-53 | 4.69E-95  | 2.47E-05 | 5.20E-43 | 1.38E-06 | 5.52E-35 |
| rs1474728  | 32 334 290 | 6.05E-53 | 4.80E-95  | 2.69E-05 | 6.46E-43 | 1.22E-06 | 4.97E-35 |
| rs1265757  | 32 334 605 | 9.40E-07 | 1.60E-10  | 4.24E-02 | 1.81E-06 | 1.11E-04 | 2.04E-09 |
| rs10807100 | 32 335 291 | 5.30E-53 | 4.02E-95  | 2.85E-05 | 8.24E-43 | 1.29E-06 | 5.13E-35 |
| rs6929776  | 32 335 734 | 1.37E-53 | 8.51E-96  | 6.75E-05 | 2.79E-43 | 1.56E-06 | 1.02E-35 |
| rs1265754  | 32 335 915 | 9.98E-07 | 1.72E-10  | 4.62E-02 | 1.69E-06 | 1.21E-04 | 2.40E-09 |
| rs28361060 | 32 336 071 | 9.27E-95 | 1.90E-169 | 8.61E-07 | 6.34E-77 | 2.66E-11 | 3.54E-67 |
| rs6930681  | 32 336 254 | 5.30E-53 | 4.02E-95  | 2.85E-05 | 8.24E-43 | 1.38E-06 | 5.52E-35 |
| rs926594   | 32 337 593 | 5.70E-53 | 4.92E-95  | 2.67E-05 | 6.67E-43 | 1.38E-06 | 5.52E-35 |
| rs9368716  | 32 338 313 | 8.41E-33 | 4.90E-60  | 1.54E-04 | 1.27E-27 | 1.24E-04 | 6.55E-28 |
| rs2022534  | 32 339 360 | 5.30E-53 | 4.02E-95  | 2.78E-05 | 8.36E-43 | 9.84E-07 | 7.13E-35 |
| rs2022533  | 32 339 483 | 1.37E-53 | 8.51E-96  | 6.67E-05 | 2.59E-43 | 1.06E-06 | 1.32E-35 |
| rs1033500  | 32 339 605 | 4.21E-53 | 2.52E-95  | 2.88E-05 | 8.63E-43 | 4.05E-07 | 3.92E-35 |
| rs2143468  | 32 341 226 | 1.44E-50 | 9.44E-91  | 5.30E-05 | 2.42E-41 | 6.35E-07 | 1.28E-33 |
| rs2143466  | 32 341 546 | 1.21E-50 | 1.38E-89  | 1.76E-05 | 2.20E-40 | 9.57E-07 | 6.93E-34 |
| rs2143465  | 32 341 575 | 5.30E-53 | 4.02E-95  | 2.85E-05 | 8.24E-43 | 1.07E-06 | 7.19E-35 |
| rs3117137  | 32 342 134 | 8.34E-18 | 9.95E-30  | 2.02E-03 | 1.31E-20 | 4.17E-05 | 2.54E-17 |
| rs9268260  | 32 343 190 | 5.30E-53 | 4.02E-95  | 2.85E-05 | 8.24E-43 | 9.84E-07 | 7.13E-35 |
| rs4959094  | 32 345 359 | 6.22E-53 | 5.35E-95  | 2.85E-05 | 8.24E-43 | 1.03E-06 | 9.12E-35 |
| rs4959025  | 32 345 366 | 6.22E-53 | 5.35E-95  | 2.85E-05 | 8.24E-43 | 9.84E-07 | 7.13E-35 |
| rs4959026  | 32 345 684 | 6.17E-53 | 5.68E-95  | 2.85E-05 | 8.24E-43 | 9.04E-07 | 5.12E-35 |
| rs4959096  | 32 346 899 | 5.40E-53 | 4.50E-95  | 2.92E-05 | 1.04E-42 | 9.84E-07 | 7.13E-35 |
| rs9268283  | 32 347 396 | 5.64E-53 | 4.88E-95  | 2.92E-05 | 1.04E-42 | 9.84E-07 | 7.13E-35 |
| rs9268284  | 32 347 439 | 5.40E-53 | 4.50E-95  | 2.92E-05 | 1.04E-42 | 1.01E-06 | 9.20E-35 |
| rs9268285  | 32 347 780 | 5.40E-53 | 4.50E-95  | 2.92E-05 | 1.04E-42 | 9.84E-07 | 7.13E-35 |
| rs2076542  | 32 349 350 | 7.13E-53 | 6.73E-95  | 2.93E-05 | 2.74E-42 | 9.35E-07 | 4.92E-35 |
| rs2076541  | 32 349 438 | 5.40E-53 | 4.50E-95  | 2.98E-05 | 1.33E-42 | 1.04E-06 | 7.18E-35 |

|           |            |          |           |          |          |          |          |
|-----------|------------|----------|-----------|----------|----------|----------|----------|
| rs2076540 | 32 349 499 | 2.29E-54 | 1.76E-97  | 1.57E-05 | 1.87E-42 | 4.12E-07 | 1.50E-36 |
| rs2076538 | 32 349 694 | 6.22E-53 | 5.35E-95  | 2.85E-05 | 8.24E-43 | 9.84E-07 | 7.13E-35 |
| rs761187  | 32 350 259 | 2.97E-54 | 2.58E-97  | 1.62E-05 | 2.35E-42 | 3.97E-07 | 1.24E-36 |
| rs3117119 | 32 350 833 | 3.14E-16 | 1.79E-28  | 5.96E-03 | 8.93E-12 | 2.81E-02 | 1.07E-07 |
| rs3132963 | 32 352 376 | 2.90E-16 | 1.71E-28  | 3.54E-03 | 5.00E-12 | 2.74E-02 | 1.14E-07 |
| rs2395149 | 32 357 785 | 9.40E-07 | 1.60E-10  | 4.24E-02 | 1.81E-06 | 1.11E-04 | 2.04E-09 |
| rs9268326 | 32 362 376 | 5.30E-53 | 4.02E-95  | 2.74E-05 | 8.61E-43 | 9.84E-07 | 7.13E-35 |
| rs9268343 | 32 364 047 | 6.12E-53 | 7.18E-95  | 3.35E-05 | 2.30E-42 | 9.84E-07 | 7.13E-35 |
| rs9268345 | 32 364 064 | 5.30E-53 | 4.02E-95  | 2.73E-05 | 6.68E-43 | 9.84E-07 | 7.13E-35 |
| rs9268362 | 32 365 564 | 2.30E-95 | 1.55E-169 | 8.53E-07 | 8.61E-78 | 3.84E-11 | 8.63E-67 |
| rs3129927 | 32 366 050 | 9.40E-07 | 1.60E-10  | 4.24E-02 | 1.81E-06 | 1.54E-04 | 3.26E-09 |
| rs9268368 | 32 366 178 | 5.30E-53 | 4.02E-95  | 2.73E-05 | 6.68E-43 | 9.84E-07 | 7.13E-35 |
| rs2073046 | 32 368 297 | 5.30E-53 | 4.02E-95  | 2.73E-05 | 6.68E-43 | 9.84E-07 | 7.13E-35 |
| rs3129938 | 32 368 718 | 3.18E-16 | 1.92E-28  | 6.03E-03 | 6.64E-12 | 2.91E-02 | 1.46E-07 |
| rs9268384 | 32 368 809 | 5.30E-53 | 4.02E-95  | 2.78E-05 | 5.82E-43 | 7.76E-07 | 3.85E-35 |
| rs3129943 | 32 370 918 | 2.23E-19 | 1.43E-32  | 9.71E-04 | 1.38E-20 | 1.52E-05 | 5.58E-20 |
| rs2073044 | 32 371 209 | 1.46E-79 | 1.50E-141 | 2.14E-08 | 2.18E-69 | 2.45E-12 | 2.84E-62 |
| rs2076536 | 32 371 571 | 2.77E-41 | 3.10E-72  | 3.86E-08 | 1.64E-40 | 1.50E-04 | 8.47E-25 |
| rs9268401 | 32 373 541 | 2.94E-65 | 4.66E-119 | 8.87E-06 | 4.31E-53 | 6.82E-09 | 2.69E-56 |
| rs9268403 | 32 373 696 | 4.00E-65 | 6.67E-119 | 8.87E-06 | 4.31E-53 | 7.36E-09 | 1.95E-56 |
| rs9268404 | 32 373 942 | 2.73E-65 | 3.15E-119 | 8.04E-06 | 2.67E-53 | 5.97E-09 | 1.26E-56 |
| rs9268428 | 32 377 196 | 3.28E-65 | 5.21E-119 | 8.87E-06 | 4.31E-53 | 7.36E-09 | 1.95E-56 |
| rs2395153 | 32 377 818 | 9.62E-82 | 1.57E-137 | 2.43E-15 | 3.56E-64 | 2.27E-19 | 1.35E-65 |
| rs9268456 | 32 382 169 | 3.57E-65 | 6.81E-119 | 1.02E-05 | 6.59E-53 | 7.08E-09 | 2.13E-56 |
| rs9268459 | 32 382 999 | 4.18E-65 | 7.29E-119 | 9.51E-06 | 4.81E-53 | 6.31E-09 | 2.44E-56 |
| rs4373382 | 32 383 091 | 4.44E-72 | 1.35E-121 | 7.67E-12 | 3.27E-54 | 1.83E-13 | 1.53E-55 |
| rs4424066 | 32 386 651 | 2.05E-72 | 4.34E-122 | 1.19E-11 | 9.68E-54 | 7.40E-13 | 2.57E-54 |
| rs3129948 | 32 386 867 | 3.60E-30 | 6.64E-53  | 7.18E-05 | 7.01E-28 | 7.31E-05 | 1.73E-15 |



|            |            |          |           |          |          |          |          |
|------------|------------|----------|-----------|----------|----------|----------|----------|
| rs9268472  | 32 387 828 | 1.10E-72 | 1.12E-122 | 7.74E-12 | 3.35E-54 | 1.86E-13 | 3.01E-55 |
| rs9268474  | 32 389 388 | 9.38E-65 | 2.38E-118 | 8.71E-06 | 2.41E-53 | 7.36E-09 | 1.95E-56 |
| rs3129950  | 32 390 424 | 2.49E-07 | 8.57E-12  | 2.65E-02 | 1.03E-07 | 1.50E-04 | 4.33E-11 |
| rs9268475  | 32 390 454 | 9.38E-65 | 2.38E-118 | 8.71E-06 | 2.41E-53 | 7.36E-09 | 1.95E-56 |
| rs3117098  | 32 390 736 | 6.21E-30 | 1.54E-52  | 6.14E-05 | 4.98E-28 | 7.11E-05 | 1.96E-15 |
| rs17577980 | 32 392 044 | 1.39E-07 | 1.71E-15  | 1.71E-09 | 3.85E-13 | 4.44E-03 | 8.91E-06 |
| rs3817973  | 32 393 334 | 2.61E-72 | 3.52E-122 | 7.23E-12 | 1.77E-54 | 2.36E-13 | 2.94E-55 |
| rs2076530  | 32 396 039 | 1.81E-70 | 3.53E-119 | 2.54E-12 | 1.75E-55 | 2.47E-13 | 5.18E-54 |
| rs9268480  | 32 396 067 | 5.06E-65 | 1.30E-118 | 8.71E-06 | 2.41E-53 | 7.36E-09 | 1.95E-56 |
| rs2076529  | 32 396 178 | 1.28E-72 | 1.52E-122 | 7.23E-12 | 1.77E-54 | 2.36E-13 | 2.94E-55 |
| rs28366191 | 32 396 413 | 4.88E-10 | 8.61E-18  | 3.92E-04 | 1.11E-10 | 5.19E-03 | 2.22E-05 |
| rs9268481  | 32 396 579 | 5.06E-65 | 1.30E-118 | 8.71E-06 | 2.41E-53 | 6.89E-09 | 8.73E-57 |
| rs3129954  | 32 397 803 | 3.54E-30 | 6.11E-53  | 6.01E-05 | 6.41E-28 | 7.11E-05 | 1.96E-15 |
| rs3129955  | 32 398 063 | 9.55E-31 | 7.11E-54  | 6.70E-05 | 6.46E-28 | 1.06E-04 | 1.36E-14 |
| rs2294880  | 32 399 945 | 2.77E-64 | 1.92E-117 | 4.76E-06 | 1.45E-53 | 5.68E-09 | 9.79E-57 |
| rs9268482  | 32 400 000 | 5.06E-65 | 1.30E-118 | 8.71E-06 | 2.41E-53 | 7.36E-09 | 1.95E-56 |
| rs2294878  | 32 400 018 | 1.71E-63 | 9.84E-109 | 6.98E-12 | 1.66E-48 | 8.36E-08 | 1.02E-43 |
| rs3817966  | 32 400 070 | 3.52E-65 | 2.56E-118 | 5.83E-06 | 5.75E-52 | 3.08E-09 | 1.17E-57 |
| rs3817963  | 32 400 310 | 3.52E-65 | 2.56E-118 | 4.99E-06 | 3.78E-52 | 3.08E-09 | 1.17E-57 |
| rs3817962  | 32 400 537 | 5.55E-65 | 1.44E-118 | 1.21E-05 | 3.16E-53 | 7.36E-09 | 1.95E-56 |
| rs2076525  | 32 402 839 | 5.28E-65 | 1.50E-118 | 8.73E-06 | 3.52E-53 | 6.64E-09 | 1.49E-56 |
| rs2076523  | 32 403 058 | 8.97E-44 | 2.49E-81  | 6.58E-05 | 4.15E-34 | 1.92E-08 | 2.24E-32 |
| rs2076522  | 32 403 402 | 7.35E-65 | 2.65E-118 | 9.27E-06 | 3.02E-53 | 8.36E-09 | 1.31E-56 |
| rs3793127  | 32 404 138 | 8.77E-88 | 1.47E-180 | 4.26E-07 | 7.26E-78 | 1.34E-09 | 2.31E-67 |
| rs10947260 | 32 405 408 | 3.74E-09 | 1.98E-16  | 1.74E-02 | 1.92E-11 | 6.82E-16 | 2.20E-15 |
| rs10947261 | 32 405 455 | 2.70E-08 | 2.14E-15  | 8.81E-03 | 4.72E-11 | 4.46E-14 | 8.55E-14 |
| rs10947262 | 32 405 535 | 2.76E-08 | 2.22E-15  | 8.69E-03 | 3.48E-11 | 4.46E-14 | 8.55E-14 |
| rs3806156  | 32 405 921 | 9.33E-44 | 2.50E-81  | 5.94E-05 | 4.56E-34 | 1.63E-08 | 2.01E-32 |

|            |            |          |           |          |          |          |          |
|------------|------------|----------|-----------|----------|----------|----------|----------|
| rs3806157  | 32 406 024 | 1.70E-43 | 2.82E-81  | 7.36E-05 | 6.12E-35 | 3.37E-08 | 1.36E-31 |
| rs3763307  | 32 406 845 | 5.28E-65 | 1.50E-118 | 8.71E-06 | 2.41E-53 | 8.09E-09 | 1.06E-56 |
| rs3763308  | 32 406 863 | 1.74E-05 | 1.91E-10  | 7.60E-03 | 1.45E-08 | 1.12E-08 | 5.93E-09 |
| rs9268494  | 32 407 575 | 6.71E-68 | 1.30E-122 | 6.67E-07 | 5.89E-58 | 3.81E-11 | 2.74E-65 |
| rs9268497  | 32 407 647 | 4.51E-68 | 9.95E-123 | 6.32E-07 | 5.92E-58 | 4.27E-11 | 4.62E-65 |
| rs9268499  | 32 407 918 | 1.16E-62 | 5.79E-114 | 8.65E-06 | 3.73E-51 | 2.26E-09 | 4.57E-58 |
| rs6926737  | 32 407 968 | 2.52E-63 | 4.67E-108 | 1.14E-09 | 2.86E-58 | 5.24E-11 | 6.52E-56 |
| rs3763311  | 32 408 399 | 2.07E-62 | 2.41E-114 | 1.53E-05 | 2.94E-52 | 5.08E-09 | 6.98E-57 |
| rs9268507  | 32 409 762 | 1.28E-63 | 1.70E-108 | 2.05E-09 | 2.44E-58 | 6.22E-11 | 5.92E-56 |
| rs5007265  | 32 411 089 | 8.93E-64 | 9.82E-109 | 2.00E-09 | 1.71E-58 | 5.69E-11 | 4.49E-56 |
| rs3129961  | 32 411 163 | 1.15E-30 | 1.73E-53  | 8.26E-05 | 4.68E-28 | 7.46E-05 | 1.59E-15 |
| rs5007263  | 32 411 205 | 8.93E-64 | 9.82E-109 | 2.00E-09 | 1.71E-58 | 5.69E-11 | 4.49E-56 |
| rs5007259  | 32 411 324 | 8.93E-64 | 9.82E-109 | 2.05E-09 | 2.44E-58 | 5.69E-11 | 4.49E-56 |
| rs9268515  | 32 411 518 | 1.82E-82 | 8.63E-199 | 2.24E-05 | 8.34E-81 | 1.48E-08 | 5.04E-71 |
| rs9268516  | 32 411 712 | 1.28E-63 | 3.41E-116 | 1.31E-05 | 2.70E-53 | 1.48E-08 | 1.35E-56 |
| rs17208888 | 32 411 729 | 9.46E-08 | 9.71E-16  | 7.28E-10 | 1.81E-13 | 4.16E-03 | 5.94E-06 |
| rs6932542  | 32 412 485 | 1.98E-63 | 3.75E-108 | 1.91E-09 | 3.33E-58 | 5.43E-11 | 4.17E-56 |
| rs9279640  | 32 412 623 | 9.53E-31 | 1.38E-53  | 8.26E-05 | 4.68E-28 | 7.46E-05 | 1.59E-15 |
| rs4502931  | 32 413 005 | 1.13E-63 | 1.93E-108 | 2.13E-09 | 9.44E-58 | 1.78E-11 | 1.24E-55 |
| rs9268528  | 32 415 331 | 2.11E-53 | 5.56E-98  | 5.15E-04 | 1.75E-37 | 3.93E-08 | 7.46E-42 |
| rs9268541  | 32 416 750 | 1.83E-08 | 1.64E-14  | 6.46E-04 | 5.25E-09 | 1.40E-03 | 1.16E-05 |
| rs9268542  | 32 416 944 | 9.91E-52 | 2.07E-95  | 6.14E-04 | 2.08E-36 | 8.49E-08 | 3.65E-40 |
| rs9268543  | 32 417 024 | 3.66E-83 | 1.63E-208 | 6.07E-05 | 1.88E-89 | 9.08E-08 | 6.14E-73 |
| rs9268556  | 32 419 187 | 9.91E-52 | 2.07E-95  | 6.14E-04 | 2.08E-36 | 8.49E-08 | 3.65E-40 |
| rs2395163  | 32 420 032 | 1.48E-89 | 2.18E-186 | 2.23E-07 | 7.66E-86 | 7.96E-09 | 1.40E-67 |
| rs9268557  | 32 421 528 | 7.59E-73 | 6.35E-123 | 1.76E-06 | 4.01E-52 | 1.36E-09 | 6.56E-55 |
| rs3135363  | 32 421 871 | 8.75E-24 | 1.36E-43  | 5.75E-04 | 2.39E-32 | 8.45E-06 | 2.06E-34 |
| rs2187818  | 32 427 791 | 3.45E-58 | 8.17E-104 | 8.05E-04 | 7.29E-38 | 1.50E-10 | 4.52E-43 |

|           |            |          |           |          |          |          |          |
|-----------|------------|----------|-----------|----------|----------|----------|----------|
| rs9268585 | 32 429 626 | 3.18E-58 | 7.13E-104 | 7.82E-04 | 7.96E-38 | 1.54E-10 | 5.20E-43 |
| rs9268589 | 32 430 425 | 2.82E-58 | 2.69E-104 | 8.85E-04 | 2.25E-37 | 5.87E-11 | 5.18E-43 |
| rs9268606 | 32 432 293 | 2.33E-58 | 2.55E-104 | 8.91E-04 | 2.88E-37 | 5.87E-11 | 5.18E-43 |
| rs984778  | 32 432 311 | 7.64E-48 | 1.02E-81  | 2.86E-02 | 6.92E-33 | 1.54E-03 | 6.53E-24 |
| rs9501626 | 32 432 567 | 1.57E-16 | 3.87E-28  | 2.25E-02 | 4.34E-14 | 1.33E-08 | 2.98E-13 |
| rs3135338 | 32 433 440 | 5.01E-48 | 5.01E-82  | 2.90E-02 | 5.85E-33 | 1.53E-03 | 6.32E-24 |
| rs3135335 | 32 434 068 | 5.58E-48 | 6.01E-82  | 2.90E-02 | 7.96E-33 | 1.50E-03 | 6.87E-24 |
| rs2027856 | 32 434 928 | 1.57E-16 | 3.87E-28  | 2.25E-02 | 4.34E-14 | 1.94E-08 | 3.79E-13 |
| rs9268614 | 32 435 001 | 1.63E-91 | 3.02E-182 | 2.62E-07 | 1.57E-85 | 8.71E-09 | 1.59E-67 |
| rs9268615 | 32 435 112 | 7.43E-59 | 7.82E-105 | 9.35E-04 | 4.22E-37 | 2.74E-10 | 1.45E-42 |
| rs3129868 | 32 436 600 | 4.53E-16 | 7.93E-27  | 2.90E-03 | 2.10E-11 | 1.73E-03 | 1.43E-06 |
| rs2395173 | 32 437 082 | 1.22E-47 | 1.85E-81  | 2.83E-02 | 4.73E-33 | 1.53E-03 | 6.32E-24 |
| rs9268626 | 32 437 267 | 2.37E-06 | 7.85E-12  | 7.48E-07 | 5.12E-11 | 1.95E-02 | 9.82E-04 |
| rs3135395 | 32 437 415 | 5.71E-48 | 5.82E-82  | 2.86E-02 | 6.92E-33 | 1.53E-03 | 6.32E-24 |
| rs9268628 | 32 438 088 | 7.36E-08 | 8.41E-18  | 3.62E-09 | 5.12E-19 | 6.15E-03 | 8.87E-07 |
| rs9268633 | 32 438 696 | 2.41E-21 | 3.74E-37  | 9.38E-04 | 3.24E-16 | 3.74E-04 | 4.66E-09 |
| rs14004   | 32 439 932 | 4.83E-57 | 1.34E-101 | 3.46E-04 | 2.97E-37 | 6.84E-10 | 2.26E-42 |
| rs9268644 | 32 440 267 | 1.45E-16 | 7.87E-31  | 3.78E-04 | 1.22E-10 | 1.42E-02 | 2.56E-18 |
| rs9268645 | 32 440 750 | 4.95E-58 | 1.43E-103 | 1.10E-03 | 3.03E-37 | 8.47E-11 | 5.77E-43 |
| rs3135392 | 32 441 465 | 5.38E-11 | 5.01E-20  | 2.25E-02 | 9.38E-08 | 2.64E-04 | 9.40E-20 |
| rs3129882 | 32 441 753 | 1.59E-40 | 5.32E-74  | 1.60E-08 | 2.72E-42 | 8.30E-06 | 8.09E-26 |
| rs9268657 | 32 441 879 | 5.85E-58 | 3.93E-103 | 1.16E-03 | 1.99E-37 | 1.58E-10 | 6.84E-43 |
| rs6931646 | 32 442 004 | 1.25E-35 | 6.52E-65  | 2.33E-03 | 8.57E-24 | 1.72E-07 | 3.42E-35 |
| rs6911419 | 32 442 010 | 2.05E-35 | 1.31E-64  | 2.36E-03 | 1.08E-23 | 1.76E-07 | 4.57E-35 |
| rs6911777 | 32 442 219 | 7.19E-10 | 9.77E-17  | 3.30E-03 | 3.03E-10 | 4.93E-03 | 1.83E-05 |
| rs3129886 | 32 442 799 | 3.44E-33 | 1.07E-56  | 3.55E-04 | 1.03E-22 | 2.84E-04 | 8.55E-19 |
| rs9268658 | 32 442 939 | 1.36E-35 | 8.02E-65  | 2.33E-03 | 8.57E-24 | 1.60E-07 | 2.60E-35 |
| rs3135391 | 32 443 210 | 3.36E-17 | 4.37E-28  | 4.17E-03 | 5.12E-12 | 5.61E-04 | 2.74E-07 |

|           |            |          |           |          |          |          |          |
|-----------|------------|----------|-----------|----------|----------|----------|----------|
| rs8084    | 32 443 258 | 2.99E-65 | 2.15E-108 | 3.24E-06 | 2.41E-48 | 3.37E-11 | 3.88E-57 |
| rs2239804 | 32 443 746 | 1.23E-35 | 7.29E-65  | 2.33E-03 | 8.57E-24 | 1.72E-07 | 3.42E-35 |
| rs7192    | 32 443 869 | 1.57E-57 | 3.85E-95  | 3.67E-04 | 8.26E-44 | 3.33E-09 | 1.13E-52 |
| rs3129888 | 32 443 949 | 5.87E-26 | 3.12E-43  | 3.61E-02 | 3.94E-17 | 5.50E-04 | 4.93E-16 |
| rs2239803 | 32 444 056 | 2.49E-40 | 2.07E-73  | 2.02E-03 | 8.81E-30 | 8.75E-09 | 1.75E-41 |
| rs2239802 | 32 444 069 | 2.64E-28 | 7.05E-48  | 4.94E-03 | 8.59E-20 | 6.59E-04 | 4.03E-16 |
| rs7195    | 32 444 762 | 3.20E-57 | 1.25E-94  | 5.45E-04 | 1.11E-43 | 1.36E-09 | 1.40E-53 |
| rs7197    | 32 444 803 | 1.76E-22 | 1.64E-37  | 3.68E-02 | 2.45E-16 | 3.66E-03 | 4.80E-13 |
| rs3135388 | 32 445 274 | 3.35E-17 | 5.13E-28  | 8.71E-03 | 9.29E-12 | 5.43E-04 | 2.26E-07 |
| rs2213586 | 32 445 317 | 1.28E-57 | 2.95E-95  | 4.86E-04 | 6.30E-44 | 3.84E-09 | 3.80E-53 |
| rs2213585 | 32 445 373 | 1.43E-57 | 3.30E-95  | 4.90E-04 | 7.83E-44 | 3.84E-09 | 3.80E-53 |
| rs2395182 | 32 445 540 | 2.50E-28 | 6.93E-48  | 5.83E-03 | 4.31E-20 | 7.69E-04 | 7.24E-16 |
| rs2227139 | 32 445 682 | 1.20E-57 | 2.42E-95  | 5.12E-04 | 9.75E-44 | 3.84E-09 | 3.80E-53 |
| rs3129889 | 32 445 768 | 3.35E-17 | 5.13E-28  | 8.71E-03 | 9.29E-12 | 5.43E-04 | 2.26E-07 |
| rs3763326 | 32 445 780 | 1.09E-07 | 2.93E-12  | 3.21E-04 | 7.50E-07 | 5.97E-09 | 3.21E-09 |
| rs3763327 | 32 446 053 | 1.75E-57 | 5.05E-95  | 3.05E-04 | 6.18E-43 | 3.06E-09 | 1.18E-52 |
| rs7754768 | 32 452 402 | 4.44E-56 | 3.22E-93  | 2.06E-04 | 2.48E-42 | 5.85E-09 | 7.91E-54 |
| rs6457590 | 32 454 021 | 9.18E-10 | 1.23E-17  | 3.33E-02 | 6.93E-10 | 3.52E-05 | 1.16E-09 |
| rs9268831 | 32 459 971 | 6.56E-24 | 2.19E-45  | 3.19E-03 | 1.50E-16 | 1.14E-03 | 5.05E-23 |
| rs9268832 | 32 460 012 | 1.19E-55 | 1.13E-92  | 5.83E-05 | 9.48E-42 | 2.11E-09 | 9.18E-54 |
| rs9268835 | 32 460 338 | 3.95E-81 | 3.76E-143 | 1.55E-07 | 4.79E-73 | 2.23E-11 | 3.46E-64 |
| rs6923504 | 32 460 409 | 3.47E-39 | 7.55E-70  | 4.01E-06 | 4.27E-46 | 4.52E-06 | 2.87E-21 |
| rs6903608 | 32 460 508 | 3.63E-39 | 8.59E-70  | 3.98E-06 | 5.92E-46 | 4.52E-06 | 2.87E-21 |
| rs9268838 | 32 460 938 | 4.00E-81 | 4.48E-143 | 1.46E-07 | 2.45E-73 | 2.47E-11 | 1.91E-64 |
| rs9268853 | 32 461 866 | 8.17E-67 | 2.50E-120 | 1.02E-06 | 3.95E-64 | 1.50E-11 | 2.86E-57 |
| rs9268882 | 32 463 846 | 4.40E-39 | 1.12E-69  | 3.17E-06 | 1.66E-46 | 5.02E-06 | 2.16E-21 |
| rs9268923 | 32 465 058 | 4.31E-67 | 1.07E-120 | 9.84E-07 | 2.84E-64 | 1.69E-11 | 3.76E-57 |
| rs2395185 | 32 465 390 | 6.08E-67 | 1.66E-120 | 9.84E-07 | 2.84E-64 | 1.69E-11 | 3.76E-57 |

|            |            |           |           |          |           |          |          |
|------------|------------|-----------|-----------|----------|-----------|----------|----------|
| rs9405108  | 32 470 871 | 4.62E-67  | 9.73E-121 | 9.84E-07 | 2.84E-64  | 1.69E-11 | 3.76E-57 |
| rs9269081  | 32 473 323 | 1.85E-41  | 6.47E-73  | 3.73E-06 | 2.85E-48  | 7.85E-06 | 6.22E-21 |
| rs1964995  | 32 481 634 | 2.99E-103 | 5.31E-166 | 1.42E-15 | 9.64E-92  | 4.85E-19 | 2.15E-79 |
| rs2157339  | 32 543 895 | 9.40E-10  | 1.73E-16  | 4.60E-02 | 2.07E-07  | 9.38E-10 | 5.19E-11 |
| rs477515   | 32 601 914 | 5.82E-63  | 5.81E-115 | 7.87E-07 | 2.08E-60  | 2.09E-10 | 4.09E-57 |
| rs9270986  | 32 606 283 | 2.68E-15  | 1.01E-25  | 1.62E-03 | 3.94E-10  | 1.18E-03 | 2.99E-07 |
| rs2858867  | 32 607 548 | 2.06E-34  | 2.15E-60  | 5.98E-05 | 9.08E-37  | 8.24E-05 | 1.48E-32 |
| rs482044   | 32 608 287 | 6.89E-38  | 8.07E-73  | 7.28E-06 | 1.39E-37  | 1.09E-08 | 5.52E-36 |
| rs660895   | 32 609 603 | 5.20E-95  | 5.19E-217 | 2.11E-07 | 1.15E-100 | 1.17E-10 | 4.69E-68 |
| rs532098   | 32 610 275 | 1.08E-23  | 8.75E-47  | 2.29E-03 | 1.61E-25  | 1.38E-02 | 8.85E-15 |
| rs13207945 | 32 611 931 | 1.09E-23  | 9.84E-47  | 2.20E-03 | 1.71E-25  | 1.38E-02 | 8.85E-15 |
| rs4530903  | 32 614 112 | 1.28E-05  | 8.09E-09  | 1.11E-02 | 3.91E-05  | 4.10E-02 | 6.03E-04 |
| rs521539   | 32 614 196 | 5.64E-95  | 5.73E-217 | 2.11E-07 | 1.15E-100 | 1.29E-10 | 1.57E-68 |
| rs642093   | 32 614 298 | 4.00E-18  | 1.48E-34  | 3.67E-04 | 5.21E-28  | 1.15E-02 | 1.15E-18 |
| rs3104413  | 32 614 873 | 7.82E-97  | 6.55E-242 | 4.56E-07 | 3.50E-110 | 7.80E-11 | 8.49E-86 |
| rs6931277  | 32 615 580 | 1.23E-96  | 4.23E-242 | 2.90E-07 | 8.41E-110 | 7.06E-11 | 2.47E-86 |
| rs9271366  | 32 619 077 | 3.90E-17  | 1.63E-28  | 8.04E-04 | 1.29E-11  | 1.72E-03 | 8.43E-07 |
| rs9271488  | 32 621 223 | 6.58E-68  | 1.91E-122 | 1.09E-07 | 3.92E-65  | 5.53E-11 | 4.44E-57 |
| rs3129763  | 32 623 148 | 1.14E-20  | 3.03E-38  | 6.22E-05 | 3.88E-30  | 6.38E-03 | 2.56E-20 |
| rs9271588  | 32 623 176 | 2.54E-87  | 2.51E-144 | 9.91E-13 | 1.12E-79  | 3.67E-15 | 1.35E-72 |
| rs9271640  | 32 624 423 | 3.70E-19  | 4.07E-32  | 5.75E-03 | 1.09E-13  | 5.92E-03 | 4.02E-13 |
| rs9271775  | 32 626 551 | 2.29E-21  | 2.56E-35  | 8.20E-03 | 6.84E-15  | 3.53E-03 | 7.87E-13 |
| rs3129768  | 32 627 306 | 3.68E-19  | 4.06E-32  | 5.83E-03 | 1.29E-13  | 5.92E-03 | 4.02E-13 |
| rs3104389  | 32 627 320 | 7.66E-68  | 2.37E-122 | 1.04E-07 | 3.06E-65  | 3.56E-11 | 4.62E-57 |
| rs9271858  | 32 627 446 | 6.31E-27  | 1.66E-52  | 1.50E-05 | 3.92E-34  | 6.64E-04 | 1.07E-26 |
| rs9272105  | 32 632 222 | 1.50E-31  | 1.63E-60  | 5.41E-07 | 1.48E-38  | 2.87E-07 | 5.38E-36 |
| rs9272143  | 32 633 026 | 2.86E-26  | 1.48E-51  | 1.57E-05 | 4.02E-34  | 7.18E-04 | 9.75E-27 |
| rs9272219  | 32 634 492 | 7.11E-27  | 2.03E-49  | 7.24E-04 | 6.17E-36  | 6.27E-04 | 1.27E-27 |

|            |            |          |           |          |          |          |          |
|------------|------------|----------|-----------|----------|----------|----------|----------|
| rs9273012  | 32 643 864 | 7.11E-27 | 2.03E-49  | 6.22E-04 | 3.16E-36 | 6.38E-04 | 1.12E-27 |
| rs9273363  | 32 658 495 | 6.55E-11 | 1.11E-22  | 1.15E-03 | 1.23E-13 | 1.31E-02 | 6.35E-13 |
| rs9273448  | 32 659 970 | 4.73E-42 | 1.83E-70  | 1.40E-03 | 2.01E-33 | 5.06E-07 | 2.08E-31 |
| rs3891175  | 32 666 690 | 1.22E-24 | 3.44E-42  | 2.48E-03 | 5.22E-21 | 2.37E-06 | 2.48E-21 |
| rs3852215  | 32 667 724 | 2.60E-21 | 3.21E-36  | 5.83E-03 | 2.65E-18 | 1.91E-06 | 1.10E-17 |
| rs9275141  | 32 683 340 | 7.96E-34 | 1.24E-62  | 3.57E-03 | 1.91E-26 | 5.61E-06 | 2.94E-31 |
| rs3021061  | 32 684 062 | 6.44E-13 | 2.63E-26  | 9.23E-05 | 4.58E-18 | 8.41E-03 | 1.76E-22 |
| rs4947342  | 32 685 293 | 4.13E-13 | 9.02E-27  | 4.74E-05 | 3.99E-19 | 8.41E-03 | 1.76E-22 |
| rs4642516  | 32 689 766 | 7.96E-34 | 1.24E-62  | 4.60E-03 | 1.37E-26 | 4.37E-06 | 3.73E-31 |
| rs7775228  | 32 690 302 | 2.48E-16 | 4.56E-29  | 1.92E-02 | 1.52E-11 | 2.31E-07 | 4.13E-13 |
| rs9275224  | 32 692 101 | 2.53E-97 | 6.24E-158 | 3.53E-09 | 3.27E-70 | 6.43E-12 | 4.06E-65 |
| rs2858324  | 32 692 598 | 1.41E-65 | 1.17E-108 | 3.78E-06 | 3.40E-53 | 5.08E-10 | 3.18E-55 |
| rs5000634  | 32 695 787 | 1.17E-61 | 8.67E-110 | 7.45E-04 | 5.11E-44 | 9.10E-09 | 3.64E-40 |
| rs6457617  | 32 696 074 | 9.04E-96 | 3.33E-156 | 9.14E-09 | 8.57E-70 | 1.41E-12 | 1.44E-64 |
| rs6457620  | 32 696 222 | 1.10E-95 | 4.32E-156 | 5.55E-09 | 5.33E-70 | 1.44E-12 | 7.73E-65 |
| rs2647015  | 32 696 316 | 2.28E-12 | 1.95E-22  | 7.01E-03 | 7.01E-11 | 8.59E-03 | 7.96E-06 |
| rs7745040  | 32 696 555 | 1.17E-61 | 8.67E-110 | 7.38E-04 | 3.73E-44 | 1.71E-08 | 9.44E-40 |
| rs2647012  | 32 696 681 | 3.16E-66 | 9.55E-110 | 5.22E-06 | 2.35E-52 | 8.04E-10 | 3.03E-55 |
| rs9275332  | 32 699 166 | 2.73E-60 | 4.50E-107 | 9.18E-08 | 5.82E-56 | 1.47E-12 | 5.60E-47 |
| rs9275334  | 32 699 330 | 6.78E-52 | 2.47E-118 | 2.82E-06 | 1.18E-53 | 1.47E-03 | 6.07E-51 |
| rs9275338  | 32 699 566 | 2.25E-45 | 3.64E-92  | 5.38E-06 | 8.07E-47 | 1.47E-03 | 3.10E-34 |
| rs17427599 | 32 699 587 | 1.74E-41 | 4.10E-74  | 1.17E-05 | 1.68E-33 | 7.08E-03 | 1.12E-15 |
| rs9275371  | 32 700 519 | 2.92E-60 | 4.94E-107 | 1.14E-07 | 6.35E-56 | 4.28E-12 | 9.14E-46 |
| rs1612904  | 32 701 241 | 5.55E-55 | 7.36E-93  | 8.73E-05 | 2.65E-46 | 1.58E-08 | 1.98E-51 |
| rs9275390  | 32 701 379 | 8.02E-60 | 1.92E-106 | 8.18E-08 | 7.18E-56 | 1.39E-12 | 6.08E-47 |
| rs9275393  | 32 701 662 | 2.62E-60 | 4.25E-107 | 1.16E-07 | 9.25E-56 | 1.36E-12 | 7.46E-47 |
| rs2858308  | 32 702 223 | 8.22E-13 | 4.92E-23  | 1.08E-02 | 1.07E-10 | 3.93E-03 | 5.46E-06 |
| rs9275407  | 32 702 260 | 2.73E-60 | 4.50E-107 | 9.18E-08 | 5.82E-56 | 1.36E-12 | 5.77E-47 |

|           |            |          |           |          |          |          |          |
|-----------|------------|----------|-----------|----------|----------|----------|----------|
| rs2856717 | 32 702 531 | 2.50E-65 | 2.17E-108 | 1.02E-06 | 1.84E-52 | 7.01E-10 | 1.51E-54 |
| rs9275425 | 32 703 097 | 2.86E-60 | 4.85E-107 | 1.64E-07 | 4.79E-56 | 1.38E-12 | 2.18E-46 |
| rs2856705 | 32 703 179 | 9.77E-13 | 4.42E-23  | 7.00E-03 | 5.87E-11 | 4.86E-03 | 5.65E-06 |
| rs9275428 | 32 703 201 | 2.73E-60 | 4.50E-107 | 9.18E-08 | 5.82E-56 | 1.39E-12 | 6.08E-47 |
| rs9275439 | 32 703 744 | 3.35E-60 | 8.05E-107 | 9.18E-08 | 5.82E-56 | 1.39E-12 | 6.08E-47 |
| rs9275495 | 32 705 797 | 8.53E-52 | 1.34E-117 | 3.75E-06 | 1.73E-53 | 1.47E-03 | 5.06E-51 |
| rs9275530 | 32 707 746 | 1.80E-51 | 9.66E-118 | 3.81E-06 | 1.99E-53 | 1.30E-03 | 3.21E-50 |
| rs9275532 | 32 707 857 | 9.16E-52 | 4.11E-118 | 2.47E-06 | 8.89E-54 | 1.47E-03 | 5.06E-51 |
| rs9275580 | 32 711 685 | 4.33E-71 | 3.30E-124 | 1.86E-07 | 2.58E-60 | 7.46E-13 | 1.83E-60 |
| rs3129727 | 32 711 913 | 1.47E-05 | 3.96E-09  | 7.96E-04 | 1.92E-06 | 1.10E-02 | 6.10E-04 |
| rs9275582 | 32 712 293 | 7.87E-71 | 3.27E-124 | 1.17E-06 | 1.11E-57 | 6.18E-12 | 1.60E-60 |
| rs7745656 | 32 713 193 | 2.63E-20 | 2.66E-40  | 5.83E-06 | 4.89E-24 | 1.20E-02 | 5.86E-12 |
| rs2647087 | 32 713 272 | 2.28E-20 | 1.70E-40  | 5.55E-06 | 3.74E-24 | 1.20E-02 | 5.86E-12 |
| rs2858332 | 32 713 384 | 3.30E-15 | 6.97E-26  | 1.05E-02 | 1.33E-12 | 2.76E-10 | 2.19E-28 |
| rs3957146 | 32 713 753 | 1.33E-51 | 7.74E-118 | 2.48E-06 | 1.71E-53 | 1.31E-03 | 9.53E-51 |
| rs2647089 | 32 713 791 | 1.87E-20 | 1.73E-40  | 5.60E-06 | 2.88E-24 | 1.17E-02 | 7.21E-12 |
| rs9275596 | 32 713 854 | 2.96E-55 | 3.81E-93  | 6.41E-05 | 4.54E-45 | 1.64E-08 | 6.38E-50 |
| rs6935723 | 32 713 892 | 2.94E-20 | 2.54E-40  | 5.55E-06 | 3.18E-24 | 1.11E-02 | 7.82E-12 |
| rs3104402 | 32 713 899 | 1.26E-10 | 1.81E-17  | 2.56E-03 | 5.24E-05 | 3.27E-02 | 8.36E-06 |
| rs3998158 | 32 714 215 | 2.76E-73 | 6.41E-127 | 7.78E-08 | 1.33E-63 | 5.73E-11 | 4.68E-60 |
| rs3998159 | 32 714 242 | 3.49E-51 | 1.45E-116 | 5.36E-06 | 1.55E-52 | 1.25E-03 | 4.63E-51 |
| rs9275599 | 32 714 652 | 8.41E-47 | 9.98E-106 | 1.53E-05 | 1.87E-49 | 3.31E-03 | 7.05E-48 |
| rs3104407 | 32 714 675 | 8.04E-22 | 1.96E-41  | 6.35E-03 | 3.30E-19 | 9.82E-03 | 1.56E-20 |
| rs3873444 | 32 714 947 | 1.12E-10 | 8.17E-22  | 1.04E-06 | 1.53E-16 | 2.81E-06 | 3.21E-08 |
| rs9275698 | 32 720 196 | 3.06E-31 | 1.11E-54  | 3.28E-04 | 8.30E-21 | 3.44E-02 | 1.61E-14 |
| rs9276189 | 32 731 548 | 1.03E-11 | 1.69E-19  | 4.89E-03 | 4.43E-07 | 2.24E-02 | 5.24E-05 |
| rs4394270 | 32 742 187 | 1.19E-28 | 6.79E-50  | 9.95E-04 | 4.16E-16 | 1.59E-02 | 1.66E-14 |
| rs2857208 | 32 775 326 | 4.91E-10 | 4.70E-18  | 2.96E-02 | 1.29E-08 | 1.52E-02 | 1.05E-04 |

|            |            |          |          |          |          |          |          |
|------------|------------|----------|----------|----------|----------|----------|----------|
| rs7767167  | 32 797 405 | 2.29E-12 | 7.31E-21 | 9.93E-03 | 8.99E-09 | 5.55E-03 | 7.24E-06 |
| rs2857107  | 32 817 738 | 2.80E-12 | 6.44E-22 | 8.38E-04 | 1.85E-12 | 1.11E-04 | 4.66E-07 |
| rs1894411  | 32 825 196 | 2.36E-12 | 5.14E-22 | 8.77E-04 | 5.25E-12 | 1.63E-04 | 6.55E-07 |
| rs3819721  | 32 837 021 | 3.68E-46 | 4.70E-84 | 1.91E-02 | 1.44E-27 | 5.31E-03 | 2.45E-22 |
| rs9276831  | 32 864 256 | 1.89E-09 | 1.29E-18 | 1.26E-04 | 2.77E-11 | 1.10E-03 | 1.70E-06 |
| rs9500927  | 32 993 584 | 9.93E-12 | 3.52E-23 | 6.04E-03 | 4.70E-13 | 2.36E-05 | 4.98E-09 |
| rs9380335  | 33 057 397 | 1.72E-11 | 7.29E-22 | 2.73E-02 | 1.79E-12 | 3.22E-04 | 1.46E-08 |
| rs4604307  | 33 057 894 | 2.14E-11 | 1.10E-21 | 2.88E-02 | 1.95E-12 | 2.04E-04 | 9.51E-09 |
| rs2395309  | 33 058 469 | 1.65E-11 | 7.24E-22 | 2.81E-02 | 3.05E-12 | 2.84E-04 | 1.22E-08 |
| rs7905     | 33 065 198 | 1.65E-09 | 8.57E-19 | 3.10E-03 | 4.47E-11 | 1.73E-03 | 5.25E-07 |
| rs3077     | 33 065 245 | 1.84E-11 | 8.89E-22 | 2.73E-02 | 1.79E-12 | 2.84E-04 | 1.22E-08 |
| rs9469332  | 33 067 099 | 1.63E-11 | 8.05E-22 | 1.86E-02 | 8.77E-13 | 2.84E-04 | 1.22E-08 |
| rs9469341  | 33 068 100 | 1.77E-11 | 8.61E-22 | 1.99E-02 | 1.25E-12 | 2.77E-04 | 1.13E-08 |
| rs1126769  | 33 068 657 | 1.99E-11 | 8.85E-22 | 2.88E-02 | 2.71E-12 | 2.84E-04 | 1.22E-08 |
| rs10214910 | 33 069 898 | 2.43E-11 | 2.51E-21 | 1.40E-02 | 3.16E-13 | 1.39E-04 | 6.12E-09 |
| rs2301224  | 33 070 592 | 1.65E-11 | 1.36E-21 | 4.24E-02 | 2.12E-12 | 8.97E-05 | 4.62E-09 |
| rs2301220  | 33 070 989 | 1.31E-11 | 8.79E-22 | 4.01E-02 | 2.69E-12 | 7.62E-05 | 3.73E-09 |
| rs6914849  | 33 072 938 | 1.51E-11 | 1.04E-21 | 4.01E-02 | 2.69E-12 | 6.78E-05 | 3.22E-09 |
| rs9348904  | 33 073 058 | 1.51E-11 | 1.04E-21 | 4.12E-02 | 2.51E-12 | 7.55E-05 | 3.95E-09 |
| rs1431399  | 33 073 257 | 1.51E-11 | 1.04E-21 | 4.01E-02 | 2.69E-12 | 7.62E-05 | 3.73E-09 |
| rs1431400  | 33 073 399 | 1.61E-11 | 1.16E-21 | 4.01E-02 | 2.69E-12 | 7.29E-05 | 3.10E-09 |
| rs1431401  | 33 073 409 | 1.51E-11 | 1.04E-21 | 4.01E-02 | 2.69E-12 | 7.29E-05 | 3.10E-09 |
| rs987870   | 33 075 103 | 1.64E-07 | 1.43E-14 | 4.75E-03 | 3.96E-09 | 4.32E-04 | 4.89E-07 |
| rs2071351  | 33 076 153 | 1.32E-11 | 9.02E-22 | 4.01E-02 | 2.69E-12 | 6.73E-05 | 3.61E-09 |
